# Supplementary material for: Prediction of Function in ABCA4-Related Retinopathy Using Ensemble Machine Learning
Source: J Clin Med. 2020 Jul 29;9(8):2428. doi: 10.3390/jcm9082428 (PMC7463567; doi:10.3390/jcm9082428)
Supplement: Supplementary file 1 [file jcm-09-02428-s001.zip]

Archive with 8 entries (8 files):
- Supplementary_Table S1 New.pdf
- Supplementary_Table S2 New.pdf
- Supplementary_Figure S1.pdf
- Supplementary_Figure S2.pdf
- Supplementary_Figure S3 New.pdf
- Supplementary_Figure S4.pdf
- Supplementary_Figure S5.pdf
- Supplementary_Figure S6.pdf
