# Supplementary material for: Prediction of Function in ABCA4-Related Retinopathy Using Ensemble Machine Learning
Source: J Clin Med. 2020 Jul 29;9(8):2428. doi: 10.3390/jcm9082428 (PMC7463567; doi:10.3390/jcm9082428)
Supplement: Supplementary file 1 [file jcm-09-02428-s001.zip › Supplementary_Table S1 New.pdf]

# Supplementary Table S1: Individual demographic and genetic data of included patients with ABCA4-related retinopathy

Supplement to *Prediction of function in ABCA4-related retinopathy using ensemble machine learning*

| Group | #  | Sex | Age [yrs] | Age of Onset [yrs] | ABCA4-Mutation                                           |                                                                         |
|-------|----|-----|-----------|--------------------|----------------------------------------------------------|-------------------------------------------------------------------------|
|       |    |     |           |                    | Allele 1                                                 | Allele 2                                                                |
| 1     | 1  | m   | 11        | 10                 | c.1622T>C / p.(Leu541Pro)<br>c.3113C>T / p.(Ala1038Val)  | ---                                                                     |
| 1     | 2  | m   | 44        | 44                 | c.5603A>T / p.(Asn1868Ile)<br>c.6148G>C / p.(Val2050Leu) | c.454C>T / p.(Arg152*)                                                  |
| 1     | 3  | f   | 13        | 16                 | c.5882G>A / p.(Gly1961Glu)                               | c.5917delG / p.(Val1973*)                                               |
| 1     | 4  | f   | 66        | 67                 | c.768G>T / p.(Val256Val)                                 | c.5603A>T / p.(Asn1868Ile)                                              |
| 1     | 5  | f   | 52        | 53                 | c.5461-10T>C<br>c.5603A>T / p.(Asn1868Ile)               | c.5603A>T / p.(Asn1868Ile)                                              |
| 1     | 6  | f   | 20        | 54                 | c.5882G>A / p.(Gly1961Glu)                               | c.5916+2T>C (SSM)                                                       |
| 1     | 7  | f   | 27        | 33                 | c.2588G>C / p.(Gly863Ala)<br>c.5603A>T / p.(Asn1868Ile)  | c.6449G>A / p.(Cys2150Tyr)                                              |
| 1     | 8  | m   | 17        | 17                 | c.1622T>C / p.(Leu541Pro)<br>c.3113C>T / p.(Ala1038Val)  | c.2588G>C / p.(Gly863Ala)<br>c.5603A>T / p.(Asn1868Ile)                 |
| 1     | 9  | f   | 19        | 30                 | c.206G>A / p.(Trp69*)                                    | c.5882G>A / p.(Gly1961Glu)                                              |
| 1     | 10 | f   | 50        | 51                 | c.3322C>T / p.(Arg1108Cys)                               | c.5882G>A / p.(Gly1961Glu)                                              |
| 1     | 11 | f   | 13        | 19                 | c.45G>A / p.(Trp15*)                                     | c.5882G>A / p.(Gly1961Glu)                                              |
| 1     | 12 | f   | 59        | 59                 | E20-E22 Deletion                                         | c.5603A>T / p.(Asn1868Ile)                                              |
| 1     | 13 | m   | 7         | 21                 | c.1253T>C / p.(Phe418Ser)<br>c.656G>C / p.(Arg219Thr)    | c.2588G>C / p.(Gly863Ala)<br>c.5603A>T / p.(Asn1868Ile)                 |
| 1     | 14 | f   | 18        | 41                 | c.768G>T / p.(Val256Val)                                 | c.5882G>A / p.(Gly1961Glu)                                              |
| 1     | 15 | f   | 43        | 45                 | c.634C>T / p.(Arg212Cys)<br>c.2588G>C / p.(Gly863Ala)    | c.5603A>T / p.(Asn1868Ile)                                              |
| 1     | 16 | f   | 25        | 27                 | c.194G>A / p.(Gly65Glu)                                  | c.5603A>T / p.(Asn1868Ile)                                              |
| 1     | 17 | f   | 20        | 37                 | c.5882G>A / p.(Gly1961Glu)                               | c.5916+2T>C (SSM)                                                       |
| 1     | 18 | m   | 32        | 34                 | E6 c.629T>A (p.(Leu210Gln)                               | c.4328G>A / p.(Arg1443His)                                              |
| 1     | 19 | m   | 10        | 17                 | c.956T>G / p.(Leu319Arg)                                 | c.6449G>A / p.(Cys2150Tyr)                                              |
| 1     | 20 | f   | 28        | 38                 | c.5762_5763dupTG /<br>p.(Ala1922Trpfs*18)                | c.5882G>A / p.(Gly1961Glu)                                              |
| 1     | 21 | m   | 51        | 75                 | c.5603A>T / p.(Asn1868Ile)                               | c.3210_3211dupGT /<br>p.(Ser1071Cysfs*14)<br>c.5603A>T / p.(Asn1868Ile) |
| 1     | 22 | f   | 50        | 61                 | c.5189G>A / p.(Trp1730*)                                 | c.5603A>T / p.(Asn1868Ile)                                              |
| 1     | 23 | f   | 39        | 43                 | c.5882G>A / p.(Gly1961Glu)                               | ----                                                                    |
| 1     | 24 | m   | 36        | 37                 | c.1622T>C / p.(Leu541Pro)<br>c.3113C>T / p.(Ala1038Val)  | c.6089G>A / p.(Arg2030Gln)                                              |
| 1     | 25 | f   | 32        | 47                 | c.3813+9G>C<br>c.3819dupT / p.(Leu1274Serfs*8)           | c.5882G>A / p.(Gly1961Glu)                                              |

|   |    |   |    |    |                                                             |                                                         |
|---|----|---|----|----|-------------------------------------------------------------|---------------------------------------------------------|
| 1 | 26 | f | 33 | 36 | c.2588G>C / p.(Gly863Ala)<br>c.5603A>T / p.(Asn1868Ile)     | c.3871C>T / p.(Gln1291*)                                |
| 1 | 27 | m | 5  | 18 | E17 c.2588G>C / p.(Gly863Ala)<br>c.5603A>T / p.(Asn1868Ile) | c.5461-10T>C<br>c.5603A>T / p.(Asn1868Ile)              |
| 1 | 28 | f | 12 | 13 | c.1957C>T / p.(Arg653Cys)                                   | c.5882G>A / p.(Gly1961Glu)                              |
| 1 | 29 | m | 14 | 41 | c.1584C>A / p.(Tyr528*)                                     | c.5882G>A / p.(Gly1961Glu)                              |
| 1 | 30 | m | 42 | 58 | c.4918C>T / p.(Arg1640Trp)                                  | c.5693G>A / p.(Arg1898His)                              |
| 1 | 31 | w | 11 | 12 | c.2041C>T / p.(Arg681*)                                     | c.6079C>T / p.(Leu2027Phe)                              |
| 1 | 32 | w | 6  | 16 | c.1309delC / p.(Gln437Argfs*12)                             | c.5882G>A / p.(Gly1961Glu)                              |
| 1 | 33 | m | 5  | 21 | c.5461-10T>C<br>c.5603A>T / p.(Asn1868Ile)                  | c.5882G>A / p.(Gly1961Glu)                              |
| 1 | 34 | f | 43 | 44 | c.634C>T / p.(Arg212Cys)                                    | c.3292C>T / p.(Arg1098Cys)                              |
| 1 | 35 | m | 8  | 14 | c.694C>T / p.(Cys232Phe)<br>c.2626C>T / p.(Gln876*)         | c.5882G>A / p.(Gly1961Glu)                              |
| 1 | 36 | f | 25 | 29 | c.1822T>A / p.(Phe608Ile)                                   | c.5603A>T / p.(Asn1868Ile)                              |
| 1 | 37 | f | 30 | 37 | c.4463G>A / p.(Cys1488Tyr)<br>c.6148G>C / p.(Val2050Leu)    | c.5882G>A / p.(Gly1961Glu)                              |
| 1 | 38 | f | 6  | 27 | c.872C>T / p.(Pro291Leu)<br>c.5603A>T / p.(Asn1868Ile)      | c.6310dupC / p.(Gln2104Profs*31)                        |
| 1 | 39 | f | 27 | 35 | c.2300T>A / p.(Val767Asp)                                   | c.5882G>A / p.(Gly1961Glu)                              |
| 1 | 40 | m | 47 | 58 | c.3871C>T / p.(Gln1291*)                                    | c.5882G>A / p.(Gly1961Glu)                              |
| 1 | 41 | f | 27 | 29 | c.5882G>A / p.(Gly1961Glu)                                  | c.5917delG / p.(Val1973*)                               |
| 1 | 42 | m | 5  | 36 | c.2588G>C / p.(Gly863Ala)<br>c.5603A>T / p.(Asn1868Ile)     | c.3085C>T / p.(Gln1029*)                                |
| 1 | 43 | f | 18 | 30 | c.1622T>C / p.(Leu541Pro) ;<br>c.3113C>T / p.(Ala1038Val)   | c.5603A>T / p.(Asn1868Ile)                              |
| 1 | 44 | f | 6  | 15 | c.194G>A / p.(Gly65Glu)                                     | c.2588G>C / p.(Gly863Ala)                               |
| 1 | 45 | f | 30 | 40 | c.4918C>T / p.(Arg1640Trp)                                  | ---                                                     |
| 1 | 46 | f | 30 | 36 | c.5512C>G / p.(His1838Asp)<br>c.5882G<A / p.(Gly1961Gln)    | c.5882G<A / p.(Gly1961Glu)                              |
| 1 | 47 | m | 14 | 15 | c.3813G>C / p.(Glu1271Asp)                                  | ---                                                     |
| 1 | 48 | m | 10 | 10 | c.3813G>C / p.(Glu1271Asp)                                  | ---                                                     |
| 1 | 49 | f | 17 | 24 | c.1309delC / p.(Gln437Argfs*12)                             | c.5882G>A / p.(Gly1961Glu)                              |
| 1 | 50 | f | 12 | 12 | c.4793C>A / p.(Ala1598Asp)                                  | c.4793C>A / p.(Ala1598Asp)                              |
| 1 | 51 | m | 6  | 22 | c.634C>T / p.(Arg212Cys)                                    | c.5882G<A / p.(Gly1961Gln)                              |
| 1 | 52 | f | 29 | 50 | c.634C>T / p.(Arg212Cys)                                    | c.2588G>C / p.(Gly863Ala)<br>c.5603A>T / p.(Asn1868Ile) |
| 1 | 53 | f | 36 | 37 | c.2712del / p.(Glu905Argfs*27)                              | c.5603A>T / p.(Asn1868Ile)                              |
| 1 | 54 | m | 24 | 25 | c.5603A>T / p.(Asn1868Ile)                                  | c.6419T>G / p.(Leu2140Arg)                              |
| 1 | 55 | f | 52 | 56 | c.214G>A / p.(Gly72Arg)                                     | c.5603A>T / p.(Asn1868Ile)                              |

|   |    |   |    |    |                                                                   |                                                         |
|---|----|---|----|----|-------------------------------------------------------------------|---------------------------------------------------------|
| 1 | 56 | f | 6  | 10 | c.1622T>C / p.(Leu541Pro)<br>c.3113C>T / p.(Ala1038Val)           | E13 Deletion                                            |
| 1 | 57 | f | 39 | 40 | c.1622T>C / p.(Leu541Pro)<br>c.3113C>T / p.(Ala1038Val)           | c.6089G>A / p.(Arg2030Gln)                              |
| 1 | 58 | f | 10 | 24 | c.1622T>C / p.(Leu541Pro)<br>c.3113C>T / p.(Ala1038Val)           | c.3375_3377delTCC /<br>p.(1125_1126del)                 |
| 1 | 59 | m | 24 | 32 | E6 c.716G>A / p.(Trp239*)                                         | c.5882G>A / p.(Gly1961Glu)                              |
| 1 | 60 | m | 14 | 22 | c.5882G>A / p.(Gly1961Glu)                                        | c.6729+19delGTTGGCCCTGGGG                               |
| 1 | 61 | m | 15 | 31 | c.2588G>C / p.(Gly863Ala)<br>c.5603A>T / p.(Asn1868Ile)           | c.6449G>A / p.(Cys2150Tyr)                              |
| 1 | 62 | f | 33 | 37 | c.3113C>T / p.(Ala1038Val)                                        | c.4234C>T / p.(Gln1412*)                                |
| 1 | 63 | f | 27 | 34 | c.5512C>G / p.(His1838Asp)                                        | c.5882G>A / p.(Gly1961Glu)                              |
| 1 | 64 | f | 12 | 48 | c.5512C>G / p.(His1838Asp)                                        | c.5882G>A / Gly1961Glu)                                 |
| 1 | 65 | m | 4  | 24 | c.2588G>C / p.(Gly863Ala)                                         | c.4234C>T / p.(Gln1412*)                                |
| 1 | 66 | m | 6  | 51 | c.3407G>A / p.(Gly1136Glu)                                        | c.5882G>A / p.(Gly1961Glu)                              |
| 1 | 67 | m | 13 | 15 | c.2549A>G / p.(Tyr850Cys)<br>c.5882G>A / p.(Gly1961Glu)           | c.5461-10T>C<br>c.5603A>T / p.(Asn1868Ile)              |
| 1 | 68 | f | 37 | 48 | c.1804C>T / p.(Arg602Trp)                                         | c.5882G>A / p.(Gly1961Glu)                              |
| 1 | 69 | f | 35 | 35 | c.1622T>C / p.(Leu541Pro)<br>c.3113C>T / p.(Ala1038Val)           | c.5603A>T / p.( Asn1868Ile)                             |
| 1 | 70 | f | 49 | 52 | c.4066C>T / p.(Gln1356*)<br>c.6334G>C / p.(Val2112Leu)            | c.5603A>T / p.( Asn1868Ile)                             |
| 1 | 71 | f | 21 | 23 | c.1622T>C / p.(Leu541Pro)<br>c.3113C>T / p.(Ala1038Val)           | c.5603A>T / p.(Asn1868Ile)<br>c.5714+4C>T               |
| 2 | 72 | f | 49 | 50 | c.455G>A / p.(Arg152Gln) ;<br>c.5603A>T / p.(Asn1868Ile)          | c.5461-10T>C<br>c.5603A>T / p.(Asn1868Ile)              |
| 2 | 73 | m | 40 | 51 | c.3113C>T / p.(Ala1038Val)                                        | c.6118C>T / p.(Arg2040*)                                |
| 2 | 74 | f | 45 | 50 | c.5882G>A / p.(Gly1961Glu)                                        | c.6317G>A / p.(Arg2106His)                              |
| 2 | 75 | f | 70 | 74 | c.4854G>T / p.(Trp1618Cys)                                        | c.5603A>T / p.(Asn1868Ile)                              |
| 2 | 76 | f | 10 | 13 | c.6746C>A / p.(Ala2249Asp)                                        | c.6746C>A / p.(Ala2249Asp)                              |
| 2 | 77 | m | 23 | 31 | c.1622T>C / p.(Leu541Pro)<br>c.3113C>T / p.(Ala1038Val)           | c.2588G>C / p.(Gly863Ala)<br>c.5603A>T / p.(Asn1868Ile) |
| 2 | 78 | f | 60 | 61 | c.5603 / p.(Asn1868Ile)<br>c.6215G>A / p.(Ser2072Asn)             | c.5196+1137G>A<br>c.5329A>T / p.(Met1777Leu)            |
| 2 | 79 | f | 14 | 23 | c.768G>T / p.(Val256Val)                                          | c.3386G>T / p.(Arg1129Leu)                              |
| 2 | 80 | f | 30 | 42 | c.5196+1483_5313-89del3321bp<br>c.5312+1G>A / p.(Asn1734Glyfs*14) | c.5329A>T / p.( Met1777Leu)                             |
| 2 | 81 | f | 45 | 55 | c.1411G>A / p.(Glu471Lys)                                         | c.1903C>T / p.(Gln635*)                                 |
| 2 | 82 | m | 4  | 13 | c.5917delG / p.(Val1973*)                                         | c.5917delG / p.(Val1973*)                               |
| 2 | 83 | f | 39 | 42 | c.4468T>C / p.(Cys1490Arg)<br>c.4685T>C / p.(Ile1562Thr)          | c.4458delA / p.(Ser1487Profs*39)                        |
| 2 | 84 | f | 25 | 45 | c.2588G>C / p.(Gly863Ala)<br>c.5603A>T / p.(Asn1868Ile)           | c.5461-10T>C<br>c.5603A>T / p.(Asn1868Ile)              |

|   |     |   |    |    |                                                          |                                                                                     |
|---|-----|---|----|----|----------------------------------------------------------|-------------------------------------------------------------------------------------|
| 2 | 85  | m | 25 | 27 | c.1719G>A / p.(Met573Ile)                                |                                                                                     |
| 2 | 86  | m | 37 | 38 | c.470T>A / p.(Leu157*)<br>c.5603A>T / p.(Asn1868Ile)     | c.5603A>T / p.(Asn1868Ile)                                                          |
| 2 | 87  | f | 31 | 34 | c.3195G>A / p.(Glu1399Lys)<br>c.6079C>T / p.(Leu2027Phe) | c.5929G>A / p.(Gly1977Ser)                                                          |
| 2 | 88  | f | 56 | 86 | c.4462T>C / p.(Cys1488Arg)                               |                                                                                     |
| 2 | 89  | f | 33 | 42 | c.1009T>C / p.(Phe337Leu)<br>c.5603A>T / p.(Asn1868Ile)  | c.1937+1G>A                                                                         |
| 2 | 90  | m | 48 | 51 | c.108delT / p.(Leu37Trpfs*3)                             |                                                                                     |
| 2 | 91  | f | 23 | 53 | c.3113C>T / p.(Ala1038Val)                               | c.6118C>T / p.(Arg2040*)                                                            |
| 2 | 92  | f | 29 | 68 | c.5882G>A / p.(Gly1961Glu)                               | c.6229C>T / p.(Arg2077Trp)                                                          |
| 2 | 93  | f | 39 | 77 | c.1822T>A / p.(Phe608Ile)                                | c.5603A>T / p.(Asn1868Ile)<br>c.5682G>C / p.(Leu1894Leu);<br>c.4773+48C>T           |
| 2 | 94  | m | 51 | 57 | c.768G>T / p.(Val256Val)                                 | c.1356+3_1356+4insG                                                                 |
| 2 | 95  | f | 25 | 43 | c.3212C>T / p.(Ser1071Leu)<br>c.66G>A                    | c.5917delG / p.(Val1973*)                                                           |
| 2 | 96  | f | 17 | 69 | c.4838delA / p.(Asp1613Alafs*49)                         | c.5882G>A / p.(Gly1961Glu)                                                          |
| 2 | 97  | m | 12 | 22 | c.768G>T / p.(Val256Val)                                 | c.5714+5G>A                                                                         |
| 2 | 98  | m | 10 | 22 | c.768G>T / p.(Val256Val)                                 | c.5714+5G>A                                                                         |
| 2 | 99  | m | 50 | 59 | c.2588G>C / p.(Gly863Ala)<br>c.5603A>T / p.(Afn1868Ile)  | c.4685T>C / p.(Ile1562Thr)                                                          |
| 2 | 100 | f | 10 | 21 | c.1622T>C / p.(Leu541Pro)<br>c.3113C>T / p.(Ala1038Val)  | c.3212C>T / p.(Ser1071Leu)                                                          |
| 2 | 101 | m | 08 | 19 | c.1622T>C / p.(Leu541Pro)<br>c.3113C>T / p.(Ala1038Val)  | c.3212C>T / p.(Ser1071Leu)                                                          |
| 2 | 102 | m | 11 | 11 | c.4773+3A>G                                              | c.6118C>T / p.(Arg2040*)                                                            |
| 2 | 103 | f | 6  | 28 | c.872C>T / p.(Pro291Leu)<br>c.1531C>T / p.(Arg511Cys)    | c.872C>T / p.(Pro291Leu)<br>c.1531C>T / p.(Arg511Cys)<br>c.3482G>A / p.(Arg1161His) |
| 2 | 104 | f | 14 | 62 | c.3871C>T / p.(Gln1291*)                                 | c.5882G>A / p.(Gly1961Glu)                                                          |
| 2 | 105 | f | 23 | 34 | c.1654G>A / p.(Val552Ile)<br>c.4771G>A / p.(Gly1591Arg)  | c.1622T>C / p.(Leu541Pro)<br>c.3113C>T / p.(Ala1038Val)                             |
| 2 | 106 | m | 68 | 72 | c.1804C>T / p.(Arg602Trp)                                | c.1928T>G / p.(Val643Gly)                                                           |
| 2 | 107 | f | 24 | 37 | c.1088T>A / p.(Tyr362*)                                  | c.5603A>T / p.(Asn1868Ile)<br>c.6089G>A / p.(Arg2030Gln)                            |
| 2 | 108 | m | 57 | 60 | c.2894A>G / p.(Asn965Ser)                                | c.5882G>A / p.(Gly1961Glu)                                                          |
| 2 | 109 | f | 16 | 48 | c.6089G>A / p.(Arg2030Gln)                               | c.6545_6580del36bp /<br>p.(Leu2184_Phe2193del)                                      |
| 2 | 110 | f | 49 | 49 | c.4527dupC / p.(Gln1513Prof*42)                          | c.5603A>T / p.(Asn1868Ile)                                                          |
| 2 | 111 | f | 6  | 20 | c.5714+5G>A                                              | c.5917delG / p.(Val1973*)                                                           |
| 2 | 112 | f | 51 | 52 | c.3364G>A / p.(Glu1122Lys)<br>c.768G>T / p.(Val256Val)   | c.5603A>T / p.(Asn1868Ile)                                                          |
| 2 | 113 | m | 13 | 13 | c.4793C>A / p.(Ala1598Asp)                               | c.5460+1G>A                                                                         |
| 2 | 114 | f | 56 | 58 | c.1622T>C / p.(Leu541Pro)<br>c.3113C>T / p.(Ala1038Val)  | c.5603A>T / p.(Asn1868Ile)                                                          |

|   |     |   |    |    |                                                                                   |                                                          |
|---|-----|---|----|----|-----------------------------------------------------------------------------------|----------------------------------------------------------|
| 2 | 115 | f | 56 | 65 | c.3289A>T / p.(Arg1097*)                                                          | c.5603A>T / p.(Asn1868Ile)                               |
| 2 | 116 | m | 49 | 62 | c.52C>T / p.(Arg18Trp)<br>c.1588G>A / p.(Gly863Ala)<br>c.5603A>T / p.(Asn1868Ile) | c.1715G>A / p.(Arg572Gln) ;<br>c.2828G>A / p.(Arg943Gln) |
| 2 | 117 | m | 11 | 15 | c.2041C>T / p.(Arg681*)                                                           | c.5381C>A / p.(Ala1794Asp)                               |
| 2 | 118 | f | 30 | 42 | c.45G>A / p.(Trp15*)                                                              | c.2401G>A / p.(Ala801Thr)                                |
| 2 | 119 | m | 29 | 49 | c.2588G>C / p.(Gly863Ala)                                                         | c.4297G>A / p.(Val1433Ile)                               |
| 2 | 120 | f | 20 | 44 | c.4234C>T / p.(Gln1412*)                                                          | c.5882G>A / p.(Gly1961Glu)                               |
| 2 | 121 | m | 7  | 9  | c.1622T>C / p.(Leu541Pro)<br>c.3113C>T / p.(Ala1038Val)                           | ---                                                      |
| 2 | 122 | f | 25 | 46 | c.2401G>A / p.(Ala801Thr)                                                         | c.4234C>T / p.(Gln1412*)                                 |
| 2 | 123 | f | 60 | 68 | c.4139C>T / p.(Pro1380Leu)                                                        | ---                                                      |
| 2 | 124 | f | 44 | 51 | c.4347G>T / p.(Trp1449Cys)                                                        | E12-E13 Deletion                                         |
| 2 | 125 | f | 60 | 66 | c.5603 / p.(Asn1868Ile)<br>c.6215G>A / p.(Ser2072Asn)                             | c.5196+1137G>A<br>c.5329A>T / p.(Met1777Leu)             |
| 2 | 126 | f | 67 | 78 | c.4567C>T / p.(Gln1523*)                                                          | c.5603A>T / p.(Asn1868Ile)                               |
| 3 | 127 | f | 10 | 11 | c.653G>A / p.(Arg212His)<br>c.1344delG / p.(Met448Ilefs*3)                        | c.1268G>A / p.(His423Arg)                                |
| 3 | 128 | f | 30 | 39 | c.6746C>A / p.(Ala2249Asp)                                                        | c.6746C>A / p.(Ala2249Asp)                               |
| 3 | 129 | m | 21 | 38 | c.5196+1137G>A                                                                    | E20-22 Deletion                                          |
| 3 | 130 | m | 20 | 47 | c.1622T>C / p.(Leu541Pro)<br>c.3113C>T / p.(Ala1038Val)                           | c.6089G>A / p.(Arg2030Gln)                               |
| 3 | 131 | f | 6  | 81 | c.5603A>T / p.(Asn1868Ile)                                                        | c.6419T>G / p.(Leu2140Arg)                               |
| 3 | 132 | f | 30 | 56 | c.1622T>C / p.(Leu541Pro)<br>c.3113C>T / p.(Ala1038Val)                           | E13 Deletion                                             |
| 3 | 133 | m | 46 | 76 | c.6283-2A>G                                                                       | c.6283-3C>A                                              |
| 3 | 134 | m | 40 | 47 | c.5714+5G>A                                                                       | c.6386+2C>G                                              |
| 3 | 135 | m | 12 | 31 | c.4463G>A / p.(Cys1488Tyr)<br>c.6148G>C / p.(Val2050Leu)                          | c.5714+5G>A                                              |
| 3 | 136 | f | 18 | 40 | c.2588G>C / p.(Gly863Ala)<br>c.5603A>T / p.(Asn1868Ile)                           | c.1622T>C / p.(Leu541Pro)<br>c.3113C>T / p.(Ala1038Val)  |
| 3 | 137 | m | 6  | 30 | c.4462T>C / p.(Cys1488Arg)                                                        | c.4462T>C / p.(Cys1488Arg)                               |
| 3 | 138 | m | 17 | 41 | c.2948C>T / p.(Thr983Ile)<br>c.5603A>T / p.(Afn1868Ile)                           | c.5714+5G>A                                              |
| 3 | 139 | m | 41 | 51 | c.741_744delCGTG /<br>p.(Asn247Lysfs*14)                                          | c.5603A>T / p.(Asn1868Ile)                               |
| 3 | 140 | w | 9  | 18 | c.5549T>C / p.(Leu1850Pro)                                                        | c.5509C>A / p.(Pro1837Thr)                               |
| 3 | 141 | w | 9  | 28 | c.5549T>C / p.(Leu1850Pro)                                                        | c.5509C>A / p.(Pro1837Thr)                               |
| 3 | 142 | f | 12 | 40 | c.5172G>A / p.(Trp1724*)                                                          | c.5172G>A / p.(Trp1724*)                                 |
| 3 | 143 | f | 13 | 37 | E20-22 Deletion                                                                   | c.2588G>C / p.(Gly863Ala)                                |

|   |     |   |    |    |                                                         |                                                           |
|---|-----|---|----|----|---------------------------------------------------------|-----------------------------------------------------------|
| 3 | 144 | m | 8  | 65 | c.768G>T / p.(Val256Val)<br>c.1268A>G / p.(His423Arg)   | c.1268A>G / p.(His423Arg)<br>c.5603A>T / p.(Asn1868Ile)   |
| 3 | 145 | f | 9  | 33 | c.214G>A / p.(Gly72Arg)                                 | c.6449G>A / p.(Cys2150Tyr)                                |
| 3 | 146 | f | 10 | 27 | c.1897T>C / p.(Tyr603His)                               | c.4462T>C / p.(Cys1488Arg)                                |
| 3 | 147 | m | 18 | 44 | c.4793C>A / p.(Ala1598Asp)                              | c.5460+1G>A                                               |
| 3 | 148 | f | 49 | 64 | c.3468C>G / p.(Tyr1156*)                                | c.5059A>T / p.(Ile1687Phe)                                |
| 3 | 149 | f | 30 | 61 | c.3468C>G / p.(Tyr1156*)                                | c.5059A>T / p.(Ile1687Phe)                                |
| 3 | 150 | f | 17 | 23 | c.5882G<A / p.(Gly1961Gln)<br>c.5917delG / p.(Val1973*) | c.1622T>C / p.(Leu541Pro) ;<br>c.3113C>T / p.(Ala1038Val) |
| 3 | 151 | f | 8  | 16 | c.4234C>T / p.(Gln412Tyr)                               | c.5461-10T>C                                              |
| 3 | 152 | f | 30 | 62 | c.2588G>C / p.(Gly863Ala)<br>c.5603A>T / p.(Asn1868Ile) | c.768G>T / p.(Val256Val)                                  |
| 3 | 153 | f | 9  | 26 | c.5917delG / p.(Val1973*)                               | c.5917delG/ p.(Val1973*)                                  |
| 3 | 154 | m | 7  | 17 | c.1622T>C / p.(Leu541Pro)<br>c.3113C>T / p.(Ala1038Val) | c.4234C>T / p.(Glu1412*)                                  |
| 3 | 155 | f | 9  | 14 | c.1622T>C / p.(Leu541Pro)<br>c.3113C>T / p.(Ala1038Val) | c.4234C>T / p.(Glu1412*)                                  |
| 3 | 156 | f | 5  | 10 | c.5172G>A / p.(Trp1724*)                                | c.5461-10T>C                                              |

f = female; m = male; yrs = years
