# Supplementary material for: Prediction of Function in ABCA4-Related Retinopathy Using Ensemble Machine Learning
Source: J Clin Med. 2020 Jul 29;9(8):2428. doi: 10.3390/jcm9082428 (PMC7463567; doi:10.3390/jcm9082428)
Supplement: Supplementary file 1 [file jcm-09-02428-s001.zip › Supplementary_Table S2 New.pdf]

## Supplementary Table S2: Retinal layer thickness measures for each layer and subfield

Supplement to *Prediction of function in ABCA4-related retinopathy using ensemble machine learning*

| Layer | ETDRS subfield          | Thickness measurements [ $\mu\text{m}$ ] <sup>a</sup> |              |                      |                      |                      |
|-------|-------------------------|-------------------------------------------------------|--------------|----------------------|----------------------|----------------------|
|       |                         | Controls                                              | All patients | Group 1 <sup>b</sup> | Group 2 <sup>b</sup> | Group 3 <sup>b</sup> |
| IR    | Central                 | 104.99±27.14                                          | 82.61±23.41  | 80.79±21.34          | 86.46±24.54          | 79.88±24.97          |
| IR    | Superior (Intermediate) | 188.27±18.57                                          | 170.15±20.54 | 171.45±16.16         | 170.18±23.09         | 167.02±24.20         |
| IR    | Inferior (Intermediate) | 189.87±16.43                                          | 163.54±20.09 | 165.17±12.90         | 164.53±24.96         | 157.87±22.87         |
| IR    | Nasal (Intermediate)    | 186.84±13.52                                          | 163.26±20.82 | 162.19±15.80         | 164.22±24.28         | 164.05±24.03         |
| IR    | Temporal (Intermediate) | 175.45±14.79                                          | 151.18±20.12 | 152.24±14.48         | 151.80±23.81         | 147.55±23.54         |
| IR    | Superior (External)     | 154.74±13.80                                          | 149.83±15.91 | 151.10±10.03         | 146.82±14.47         | 152.32±25.85         |
| IR    | Inferior (External)     | 157.36±14.78                                          | 146.78±15.17 | 148.54±11.00         | 143.72±16.42         | 148.22±19.74         |
| IR    | Nasal (External)        | 181.42±12.45                                          | 163.70±15.91 | 166.48±12.15         | 160.47±17.37         | 163.03±19.39         |
| IR    | Temporal (External)     | 144.21±13.39                                          | 133.66±17.97 | 136.11±9.99          | 133.26±19.31         | 128.59±26.80         |
| ONL   | Central                 | 89.30±12.81                                           | 24.26±25.14  | 25.00±25.79          | 27.87±27.14          | 15.88±16.36          |
| ONL   | Superior (Intermediate) | 70.25±8.30                                            | 28.12±15.61  | 35.66±12.30          | 24.14±16.08          | 17.55±12.62          |
| ONL   | Inferior (Intermediate) | 66.04±10.55                                           | 25.59±15.61  | 32.27±13.76          | 22.10±16.08          | 16.16±11.36          |
| ONL   | Nasal (Intermediate)    | 73.20±11.43                                           | 25.92±16.74  | 31.72±15.55          | 22.09±18.28          | 19.23±11.05          |
| ONL   | Temporal (Intermediate) | 72.25±8.27                                            | 25.77±16.47  | 33.60±13.97          | 21.47±17.02          | 15.12±11.16          |
| ONL   | Superior (External)     | 61.69±7.10                                            | 39.09±16.82  | 49.94±9.23           | 37.56±14.31          | 16.20±9.29           |
| ONL   | Inferior (External)     | 53.01±6.93                                            | 34.79±13.67  | 42.07±9.16           | 35.42±11.68          | 16.39±7.61           |
| ONL   | Nasal (External)        | 59.28±10.14                                           | 35.55±14.57  | 43.89±10.21          | 33.74±13.97          | 19.13±7.67           |
| ONL   | Temporal (External)     | 59.36±6.86                                            | 34.20±15.48  | 43.93±9.03           | 32.37±13.89          | 14.54±9.08           |
| ISOS  | Central                 | 52.17±5.14                                            | 18.59±17.37  | 22.01±17.13          | 18.64±19.23          | 10.40±10.06          |
| ISOS  | Superior (Intermediate) | 45.57±3.10                                            | 25.42±15.48  | 36.68±9.42           | 19.48±14.14          | 9.68±7.58            |
| ISOS  | Inferior (Intermediate) | 44.97±2.71                                            | 22.14±14.96  | 32.04±11.76          | 16.95±13.44          | 8.23±5.52            |
| ISOS  | Nasal (Intermediate)    | 47.10±3.42                                            | 21.83±14.94  | 31.26±12.69          | 16.71±13.17          | 8.89±5.89            |
| ISOS  | Temporal (Intermediate) | 46.25±3.14                                            | 22.23±15.84  | 33.27±12.25          | 15.82±13.91          | 7.84±4.83            |
| ISOS  | Superior (External)     | 43.14±2.28                                            | 34.34±15.03  | 43.62±5.56           | 33.96±13.06          | 13.10±11.54          |
| ISOS  | Inferior (External)     | 42.17±1.99                                            | 33.48±14.04  | 42.17±5.29           | 33.67±10.88          | 12.56±11.17          |
| ISOS  | Nasal (External)        | 44.07±2.91                                            | 33.00±13.97  | 42.27±5.83           | 30.87±12.49          | 14.97±10.61          |
| ISOS  | Temporal (External)     | 43.87±2.43                                            | 31.84±15.77  | 42.86±6.02           | 29.44±13.95          | 10.15±9.07           |
| RPE   | Central                 | 38.65±3.50                                            | 30.64±7.55   | 33.33±7.09           | 30.53±6.99           | 24.44±5.65           |
| RPE   | Superior (Intermediate) | 36.32±3.00                                            | 33.17±6.70   | 37.05±4.71           | 31.91±5.78           | 26.29±5.81           |
| RPE   | Inferior (Intermediate) | 36.45±2.58                                            | 31.73±7.07   | 35.88±5.31           | 30.24±6.22           | 24.63±5.19           |
| RPE   | Nasal (Intermediate)    | 37.20±2.65                                            | 31.69±6.84   | 35.47±5.44           | 30.46±6.05           | 25.01±5.04           |
| RPE   | Temporal (Intermediate) | 36.02±2.33                                            | 31.18±6.69   | 35.29±4.98           | 29.55±5.74           | 24.44±4.84           |
| RPE   | Superior (External)     | 36.41±2.68                                            | 36.13±6.17   | 39.59±3.54           | 36.35±5.15           | 27.54±4.17           |
| RPE   | Inferior (External)     | 35.92±2.14                                            | 35.06±5.55   | 38.02±3.32           | 35.21±4.34           | 27.78±5.09           |
| RPE   | Nasal (External)        | 35.81±2.51                                            | 35.09±5.46   | 38.30±3.51           | 34.67±4.59           | 28.28±4.05           |
| RPE   | Temporal (External)     | 34.71±2.09                                            | 34.29±6.36   | 38.14±3.65           | 33.72±4.96           | 26.25±5.76           |

<sup>a</sup> Values indicate the mean ± standard deviation.

<sup>b</sup> Groups are classified according to full-field electroretinogram classification.<sup>15</sup>

ONL: outer nuclear layer, IR: inner retina, ISOS: photoreceptor inner and outer segments, RPE: retinal pigment epithelium.
